# Supplementary material for: Molecular Dynamics Simulations and Diversity Selection by Extended Continuous Similarity Indices
Source: PubMed Central journal article supplement (PMC9326969; doi:10.1021/acs.jcim.2c00433), 2022-07-14
Supplement: ci2c00433_si_001.pdf [file ci2c00433_si_001.pdf]

## Supporting information

### Molecular dynamics simulations and diversity selection by extended continuous similarity indices

Anita Rácz<sup>1,‡</sup>, Levente M. Mihalovits<sup>2,‡</sup>, Dávid Bajusz<sup>2</sup>,  
Károly Héberger<sup>1,\*</sup>, Ramón Alain Miranda-Quintana<sup>3,\*</sup>

<sup>1</sup> Plasma Chemistry Research Group, Research Centre for Natural Sciences,  
Magyar tudósok krt. 2, 1117 Budapest, Hungary

<sup>2</sup> Medicinal Chemistry Research Group, Research Centre for Natural Sciences,  
Magyar tudósok krt. 2, 1117 Budapest, Hungary

<sup>3</sup> Department of Chemistry and Quantum Theory Project, University of Florida,  
Gainesville, FL 32611, USA

\* corresponding authors: [heberger.karoly@ttk.hu](mailto:heberger.karoly@ttk.hu), [quintana@chem.ufl.edu](mailto:quintana@chem.ufl.edu)

‡ these authors contributed equally

**Table S1.** The sum of ranks and number of wins for the two best extended continuous similarity indices and the three benchmark algorithms.

|                        | cCT2 | cRT | kmeans | hieragglo | affprop |
|------------------------|------|-----|--------|-----------|---------|
| <b>Sum of rankings</b> | 313  | 291 | 564    | 398       | 598     |
| <b>Number of wins</b>  | 8    | 12  | 0      | 8         | 0       |

#### I. Example calculation of the non-weighted extended continuous Rogers-Tanimoto index

Let us consider the following toy model of ( $n = 5$ ) real-valued vectors:

|       |         |         |        |        |         |         |         |         |
|-------|---------|---------|--------|--------|---------|---------|---------|---------|
| $V_1$ | 5.6584  | -0.1176 | 4.5032 | 4.868  | 0.1256  | 5.7192  | -0.1784 | -0.2392 |
| $V_2$ | 5.172   | -0.1784 | 4.868  | 4.1384 | 0.308   | 4.6856  | 0.004   | -0.1176 |
| $V_3$ | -0.2392 | 0.308   | 5.3544 | 0.3688 | -0.0568 | 0.4904  | 0.4296  | 5.78    |
| $V_4$ | 4.9896  | 0.0648  | 4.8072 | 5.6584 | 4.3816  | -0.1176 | -0.1176 | 5.0504  |
| $V_5$ | 0.4296  | -0.0568 | 5.2328 | 5.1112 | -0.3    | 4.5032  | 0.612   | -0.1784 |

The maximum and minimum values are 5.78 and -0.3, respectively.

We then proceed to normalize these entries following Eq. (2) in the manuscript:

|       |      |      |      |      |      |      |      |      |
|-------|------|------|------|------|------|------|------|------|
| $N_1$ | 0.98 | 0.03 | 0.79 | 0.85 | 0.07 | 0.99 | 0.02 | 0.01 |
| $N_2$ | 0.9  | 0.02 | 0.85 | 0.73 | 0.1  | 0.82 | 0.05 | 0.03 |
| $N_3$ | 0.01 | 0.1  | 0.93 | 0.11 | 0.04 | 0.13 | 0.12 | 1    |
| $N_4$ | 0.87 | 0.06 | 0.84 | 0.98 | 0.77 | 0.03 | 0.03 | 0.88 |
| $N_5$ | 0.12 | 0.04 | 0.91 | 0.89 | 0    | 0.79 | 0.15 | 0.02 |

The next step is then to calculate the sum of each column:

|          |      |      |      |      |      |      |      |      |
|----------|------|------|------|------|------|------|------|------|
| $\sigma$ | 2.88 | 0.25 | 4.32 | 3.56 | 0.98 | 2.76 | 0.37 | 1.94 |
|----------|------|------|------|------|------|------|------|------|

Now we need to identify which of these columns correspond to high-content (hc:  $2\sigma_i - n > \gamma$ ), low-content (lc:  $n - 2\sigma_i > \gamma$ ), or dissimilarity (dis:  $|2\sigma_i - n| \leq \gamma$ ) counters, taking into account that, in this particular case, we take the lowest possible coincidence threshold value,  $\gamma = 5 \bmod 2 = 1$ . This leads to the following classification:

|                 |     |    |    |    |    |     |    |    |
|-----------------|-----|----|----|----|----|-----|----|----|
| <b>counters</b> | dis | lc | hc | hc | lc | dis | lc | lc |
|-----------------|-----|----|----|----|----|-----|----|----|

Finally, we just need to calculate the weighted values of the column sums (in order to correctly penalize for partial coincidences). Here we use simple fraction weights, with  $f_s(\sigma_i) = |2\sigma_i - n|/n$  for the hc or lc counters, and  $f_d(\sigma_i) = 1 - (|2\sigma_i - n| - n \bmod 2)/n$  for the dis counters:

|                    |       |      |       |       |       |       |       |       |
|--------------------|-------|------|-------|-------|-------|-------|-------|-------|
| $\sigma$           | 2.88  | 0.25 | 4.32  | 3.56  | 0.98  | 2.76  | 0.37  | 1.94  |
| <b>counters</b>    | dis   | lc   | hc    | hc    | lc    | dis   | lc    | lc    |
| <b>w (weights)</b> | 1.048 | 0.9  | 0.728 | 0.424 | 0.608 | 1.096 | 0.852 | 0.224 |

This is all we need to calculate the continuous extended Rogers-Tanimoto index ( $w_{hc}$  and  $w_{lc}$  stand for weighted high-content and weighted low-content, respectively):

$$cRT = \frac{\sum w \cdot hc + \sum w \cdot lc}{hc + lc + 2dis} = \frac{(0.728 + 0.424) + (0.9 + 0.608 + 0.852 + 0.224)}{2 + 4 + 2 * 2} = 0.3736 \quad (1)$$

**Table S2.** Summary of abbreviations, notation, and formulas corresponding to the extended continuous similarity indices.

| <b>Additive indices</b> |                         |                             |                                |                                                                                                                                                                                                                                                                                                 |
|-------------------------|-------------------------|-----------------------------|--------------------------------|-------------------------------------------------------------------------------------------------------------------------------------------------------------------------------------------------------------------------------------------------------------------------------------------------|
| <b>Label</b>            | <b>Type<sup>a</sup></b> | <b>Notation<sup>b</sup></b> | <b>Name</b>                    | <b>Equation</b>                                                                                                                                                                                                                                                                                 |
| cAC                     | cAC_hc                  | cACw                        | continuous Austin-Colwell      | $S_{cAC}(hc\_wd) = \frac{2}{\pi} \arcsin \sqrt{\frac{\sum_{hc-s} f_s(\Delta_n(k)) C_n(k) + \sum_{lc-s} f_s(\Delta_n(k)) C_n(k)}{\sum_s f_s(\Delta_n(k)) C_n(k) + \sum_d f_d(\Delta_n(k)) C_n(k)}}$                                                                                              |
|                         |                         | cACnw                       |                                | $S_{cAC}(hc\_d) = \frac{2}{\pi} \arcsin \sqrt{\frac{\sum_{hc-s} f_s(\Delta_n(k)) C_n(k) + \sum_{lc-s} f_s(\Delta_n(k)) C_n(k)}{\sum_s C_n(k) + \sum_d C_n(k)}}$                                                                                                                                 |
| cBUB                    | cBUB_hc                 | cBUBw                       | continuous Baroni-Urbani-Buser | $S_{cBUB}(hc\_wd) = \frac{\sqrt{[\sum_{hc-s} f_s(\Delta_n(k)) C_n(k)] [\sum_{lc-s} f_s(\Delta_n(k)) C_n(k)]} + \sum_{hc-s} f_s(\Delta_n(k)) C_n(k)}{\left\{ \sqrt{[\sum_{hc-s} f_s(\Delta_n(k)) C_n(k)] [\sum_{lc-s} f_s(\Delta_n(k)) C_n(k)]} + \sum_{hc-s} f_s(\Delta_n(k)) C_n(k) \right\}}$ |
|                         |                         | cBUBnw                      |                                | $S_{cBUB}(hc\_d) = \frac{\sqrt{[\sum_{hc-s} f_s(\Delta_n(k)) C_n(k)] [\sum_{lc-s} f_s(\Delta_n(k)) C_n(k)]} + \sum_{hc-s} f_s(\Delta_n(k)) C_n(k)}{\left\{ \sqrt{[\sum_{hc-s} C_n(k)] [\sum_{lc-s} C_n(k)]} + \sum_{hs-s} C_n(k) + \sum_d C_n(k) \right\}}$                                     |
| cCT1                    | cCT1_hc                 | cCT1w                       | continuous Consoni-            | $S_{cCT1}(hc\_wd) = \frac{\ln(1 + \sum_{hc-s} f_s(\Delta_n(k)) C_n(k) + \sum_{lc-s} f_s(\Delta_n(k)) C_n(k))}{\ln(1 + \sum_s f_s(\Delta_n(k)) C_n(k) + \sum_d f_d(\Delta_n(k)) C_n(k))}$                                                                                                        |

|      |         |        |                                            |                                                                                                                                                                                                                     |
|------|---------|--------|--------------------------------------------|---------------------------------------------------------------------------------------------------------------------------------------------------------------------------------------------------------------------|
|      |         | cCT1nw | Todeschini (1)                             | $S_{cCT1}(hc\_d) = \frac{\ln(1 + \sum_{hc-s} f_s(\Delta_n(k))C_n(k) + \sum_{lc-s} f_s(\Delta_n(k))C_n(k))}{\ln(1 + \sum_s C_n(k) + \sum_d C_n(k))}$                                                                 |
| cCT2 | cCT2_hc | cCT2w  | continuous Consoni-Todeschini (2)          | $S_{cCT2}(hc\_wd) = \frac{\ln(1 + \sum_s f_s(\Delta_n(k))C_n(k) + \sum_d f_d(\Delta_n(k))C_n(k)) - \ln(1 + \sum_d f_d(\Delta_n(k))C_n(k))}{\ln(1 + \sum_s f_s(\Delta_n(k))C_n(k) + \sum_d f_d(\Delta_n(k))C_n(k))}$ |
|      |         | cCT2nw |                                            | $S_{cCT2}(hc\_d) = \frac{\ln(1 + \sum_s f_s(\Delta_n(k))C_n(k) + \sum_d f_d(\Delta_n(k))C_n(k)) - \ln(1 + \sum_d f_d(\Delta_n(k))C_n(k))}{\ln(1 + \sum_s C_n(k) + \sum_d C_n(k))}$                                  |
| cFai | cFai_hc | cFaiw  | continuous Faith                           | $S_{cFai}(hc\_wd) = \frac{\sum_{hc-s} f_s(\Delta_n(k))C_n(k) + 0.5\sum_{lc-s} f_s(\Delta_n(k))C_n(k)}{\sum_s f_s(\Delta_n(k))C_n(k) + \sum_d f_d(\Delta_n(k))C_n(k)}$                                               |
|      |         | cFainw |                                            | $S_{cFai}(hc\_d) = \frac{\sum_{hc-s} f_s(\Delta_n(k))C_n(k) + 0.5\sum_{lc-s} f_s(\Delta_n(k))C_n(k)}{\sum_s C_n(k) + \sum_d C_n(k)}$                                                                                |
|      |         | cGKnw  |                                            | $S_{cGK}(hc\_d) = \frac{2\min(\sum_{hc-s} f_s(\Delta_n(k))C_n(k), \sum_{lc-s} f_s(\Delta_n(k))C_n(k)) - \sum_d f_d(\Delta_n(k))C_n(k)}{2\min(\sum_{hc-s} C_n(k), \sum_{lc-s} C_n(k)) + \sum_d C_n(k)}$              |
|      |         | cHDnw  |                                            | $S_{cHD}(hc\_d) = \frac{1}{2} \left( \frac{\sum_{hc-s} f_s(\Delta_n(k))C_n(k)}{\sum_{hc-s} C_n(k) + \sum_d C_n(k)} + \frac{\sum_{lc-s} f_s(\Delta_n(k))C_n(k)}{\sum_{lc-s} C_n(k) + \sum_d C_n(k)} \right)$         |
| cRT  | cRT_hc  | cRTw   | continuous Rogers-Tanimoto                 | $S_{cRT}(hc\_wd) = \frac{\sum_s f_s(\Delta_n(k))C_n(k)}{\sum_s f_s(\Delta_n(k))C_n(k) + 2\sum_d f_d(\Delta_n(k))C_n(k)}$                                                                                            |
|      |         | cRTnw  |                                            | $S_{cRT}(hc\_d) = \frac{\sum_s f_s(\Delta_n(k))C_n(k)}{\sum_s C_n(k) + 2\sum_d C_n(k)}$                                                                                                                             |
| cRG  | cRG_hc  | cRGw   | continuous Rogot-Goldberg                  | $S_{cRG}(hc\_wd) = \frac{\sum_{hc-s} f_s(\Delta_n(k))C_n(k)}{2\sum_{hc-s} f_s(\Delta_n(k))C_n(k) + \sum_d f_d(\Delta_n(k))C_n(k)} + \frac{\sum_{lc-s} f_s(\Delta_n(k))C_n(k)}{\sum_{lc-s} f_s(\Delta_n(k))C_n(k)}$  |
|      |         | cRGnw  |                                            | $S_{cRG}(hc\_d) = \frac{\sum_{hc-s} f_s(\Delta_n(k))C_n(k)}{2\sum_{hc-s} C_n(k) + \sum_d C_n(k)} + \frac{\sum_{lc-s} f_s(\Delta_n(k))C_n(k)}{2\sum_{lc-s} C_n(k) + \sum_d C_n(k)}$                                  |
| cSM  | cSM_hc  | cSMw   | continuous Simple matching, Sokal-Michener | $S_{cSM}(hc\_wd) = \frac{\sum_s f_s(\Delta_n(k))C_n(k)}{\sum_s f_s(\Delta_n(k))C_n(k) + \sum_d f_d(\Delta_n(k))C_n(k)}$                                                                                             |
|      |         | cSMnw  |                                            | $S_{cSM}(hc\_d) = \frac{\sum_s f_s(\Delta_n(k))C_n(k)}{\sum_s C_n(k) + \sum_d C_n(k)}$                                                                                                                              |
| cSS2 | cSS2_hc | cSS2w  | continuous Sokal-Sneath (2)                | $S_{cSS2}(hc\_wd) = \frac{2\sum_s f_s(\Delta_n(k))C_n(k)}{2\sum_s f_s(\Delta_n(k))C_n(k) + \sum_d f_d(\Delta_n(k))C_n(k)}$                                                                                          |
|      |         | cSS2nw |                                            | $S_{cSS2}(hc\_d) = \frac{2\sum_s f_s(\Delta_n(k))C_n(k)}{2\sum_s C_n(k) + \sum_d C_n(k)}$                                                                                                                           |

**Asymmetric indices**

| Label | Type    | Notation | Name                              | Equation                                                                                                                                        |
|-------|---------|----------|-----------------------------------|-------------------------------------------------------------------------------------------------------------------------------------------------|
| cCT3  | cCT3_hc | cCT3w    | continuous Consoni-Todeschini (3) | $S_{cCT3}(hc\_wd) = \frac{\ln(1 + \sum_{hc-s} f_s(\Delta_n(k))C_n(k))}{\ln(1 + \sum_s f_s(\Delta_n(k))C_n(k) + \sum_d f_d(\Delta_n(k))C_n(k))}$ |
|       |         | cCT3nw   |                                   | $S_{cCT3}(hc\_d) = \frac{\ln(1 + \sum_{hc-s} f_s(\Delta_n(k))C_n(k))}{\ln(1 + \sum_s C_n(k) + \sum_d C_n(k))}$                                  |
|       | cCT3_lc | cCT3lcw  |                                   | $S_{cCT3}(lc\_wd) = \frac{\ln(1 + \sum_s f_s(\Delta_n(k))C_n(k))}{\ln(1 + \sum_s f_s(\Delta_n(k))C_n(k) + \sum_d f_d(\Delta_n(k))C_n(k))}$      |

|      |         |          |                                             |                                                                                                                                                      |
|------|---------|----------|---------------------------------------------|------------------------------------------------------------------------------------------------------------------------------------------------------|
|      |         | cCT3lcnw |                                             | $S_{cCT3}(lc\_d) = \frac{\ln(1 + \sum_s f_s(\Delta_n(k))C_n(k))}{\ln(1 + \sum_s C_n(k) + \sum_d C_n(k))}$                                            |
| cCT4 | cCT4_hc | cCT4w    | continuous<br>Consoni-<br>Todeschini<br>(4) | $S_{cCT4}(hc\_wd) = \frac{\ln(1 + \sum_{hc-s} f_s(\Delta_n(k))C_n(k))}{\ln(1 + \sum_{hc-s} f_s(\Delta_n(k))C_n(k) + \sum_d f_d(\Delta_n(k))C_n(k))}$ |
|      |         | cCT4nw   |                                             | $S_{cCT4}(hc\_d) = \frac{\ln(1 + \sum_{hc-s} f_s(\Delta_n(k))C_n(k))}{\ln(1 + \sum_{hc-s} C_n(k) + \sum_d C_n(k))}$                                  |
|      | cCT4_lc | cCT4lcw  |                                             | $S_{cCT4}(lc\_wd) = \frac{\ln(1 + \sum_s f_s(\Delta_n(k))C_n(k))}{\ln(1 + \sum_s f_s(\Delta_n(k))C_n(k) + \sum_d f_d(\Delta_n(k))C_n(k))}$           |
|      |         | cCT4lcnw |                                             | $S_{cCT4}(lc\_d) = \frac{\ln(1 + \sum_s f_s(\Delta_n(k))C_n(k))}{\ln(1 + \sum_s C_n(k) + \sum_d C_n(k))}$                                            |
|      |         |          |                                             |                                                                                                                                                      |
| cGle | cGle_hc | cGlew    | continuous<br>Gleason                       | $S_{cGle}(hc\_wd) = \frac{2\sum_{hc-s} f_s(\Delta_n(k))C_n(k)}{2\sum_{hc-s} f_s(\Delta_n(k))C_n(k) + \sum_d f_d(\Delta_n(k))C_n(k)}$                 |
|      |         | cGlenw   |                                             | $S_{cGle}(hc\_d) = \frac{2\sum_{hc-s} f_s(\Delta_n(k))C_n(k)}{2\sum_{hc-s} C_n(k) + \sum_d C_n(k)}$                                                  |
|      | cGle_lc | cGlelcw  |                                             | $S_{cGle}(lc\_wd) = \frac{2\sum_s f_s(\Delta_n(k))C_n(k)}{2\sum_s f_s(\Delta_n(k))C_n(k) + \sum_d f_d(\Delta_n(k))C_n(k)}$                           |
|      |         | cGlelcnw |                                             | $S_{cGle}(lc\_d) = \frac{2\sum_s f_s(\Delta_n(k))C_n(k)}{2\sum_s C_n(k) + \sum_d C_n(k)}$                                                            |
| cJa  | cJa_hc  | cJaw     | continuous<br>Jaccard                       | $S_{cJa}(hc\_wd) = \frac{3\sum_{hc-s} f_s(\Delta_n(k))C_n(k)}{3\sum_{hc-s} f_s(\Delta_n(k))C_n(k) + \sum_d f_d(\Delta_n(k))C_n(k)}$                  |
|      |         | cJanw    |                                             | $S_{cJa}(hc\_d) = \frac{3\sum_{hc-s} f_s(\Delta_n(k))C_n(k)}{3\sum_{hc-s} C_n(k) + \sum_d C_n(k)}$                                                   |
|      | cJa_lc  | cJalcw   |                                             | $S_{cJa}(lc\_wd) = \frac{3\sum_s f_s(\Delta_n(k))C_n(k)}{3\sum_s f_s(\Delta_n(k))C_n(k) + \sum_d f_d(\Delta_n(k))C_n(k)}$                            |
|      |         | cJalcnw  |                                             | $S_{cJa}(lc\_d) = \frac{3\sum_s f_s(\Delta_n(k))C_n(k)}{3\sum_s C_n(k) + \sum_d C_n(k)}$                                                             |
| cRR  | cRR_hc  | cRRw     | continuous<br>Russel-Rao                    | $S_{cRR}(hc\_wd) = \frac{\sum_{hc-s} f_s(\Delta_n(k))C_n(k)}{\sum_s f_s(\Delta_n(k))C_n(k) + \sum_d f_d(\Delta_n(k))C_n(k)}$                         |
|      |         | cRRnw    |                                             | $S_{cRR}(hc\_d) = \frac{\sum_{hc-s} f_s(\Delta_n(k))C_n(k)}{\sum_s C_n(k) + \sum_d C_n(k)}$                                                          |
|      | cRR_lc  | cRRlcw   |                                             | $S_{cRR}(lc\_wd) = \frac{\sum_s f_s(\Delta_n(k))C_n(k)}{\sum_s f_s(\Delta_n(k))C_n(k) + \sum_d f_d(\Delta_n(k))C_n(k)}$                              |
|      |         | cRRlcnw  |                                             | $S_{cRR}(lc\_d) = \frac{\sum_s f_s(\Delta_n(k))C_n(k)}{\sum_s C_n(k) + \sum_d C_n(k)}$                                                               |
| cSS1 | cSS1_hc | cSSw     | continuous<br>Sokal-<br>Sneath (1)          | $S_{cSS1}(hc\_wd) = \frac{\sum_{hc-s} f_s(\Delta_n(k))C_n(k)}{\sum_{hc-s} f_s(\Delta_n(k))C_n(k) + 2\sum_d f_d(\Delta_n(k))C_n(k)}$                  |
|      |         | cSSnw    |                                             | $S_{cSS1}(hc\_d) = \frac{\sum_{hc-s} f_s(\Delta_n(k))C_n(k)}{\sum_{hc-s} C_n(k) + 2\sum_d C_n(k)}$                                                   |
|      | cSS1_lc | cSSlcw   |                                             | $S_{cSS1}(lc\_wd) = \frac{\sum_s f_s(\Delta_n(k))C_n(k)}{\sum_s f_s(\Delta_n(k))C_n(k) + 2\sum_d f_d(\Delta_n(k))C_n(k)}$                            |
|      |         | cSSlcnw  |                                             | $S_{cSS1}(lc\_d) = \frac{\sum_s f_s(\Delta_n(k))C_n(k)}{\sum_s C_n(k) + 2\sum_d C_n(k)}$                                                             |
| cJT  | cJT_hc  | cJTw     | continuous<br>Jaccard-<br>Tanimoto          | $S_{cJT}(hc\_wd) = \frac{\sum_{hc-s} f_s(\Delta_n(k))C_n(k)}{\sum_{hc-s} f_s(\Delta_n(k))C_n(k) + \sum_d f_d(\Delta_n(k))C_n(k)}$                    |
|      |         | cJTnw    |                                             | $S_{cJT}(hc\_d) = \frac{\sum_{hc-s} f_s(\Delta_n(k))C_n(k)}{\sum_{hc-s} C_n(k) + \sum_d C_n(k)}$                                                     |

|  |        |         |                                                                                                                                        |
|--|--------|---------|----------------------------------------------------------------------------------------------------------------------------------------|
|  | cJT_lc | cJTlcw  | $S_{cJT}(lc\_wd) = \frac{\sum_s f_s(\Delta_{n(k)}) C_{n(k)}}{\sum_s f_s(\Delta_{n(k)}) C_{n(k)} + \sum_d f_d(\Delta_{n(k)}) C_{n(k)}}$ |
|  |        | cJTlcnw | $S_{cJT}(lc\_d) = \frac{\sum_s f_s(\Delta_{n(k)}) C_{n(k)}}{\sum_s C_{n(k)} + \sum_d C_{n(k)}}$                                        |

**Equation S1.** Calculation of the RMSD between two specific frames.

$$RMSD_{m,n} = \sqrt{\frac{\sum_1^t (Coord_{t,m} - Coord_{t,n})^2}{t}}$$

Where  $i$  is the number of coordinates,  $Coord_{t,m}$  and  $Coord_{t,n}$  denote the value of the  $t^{\text{th}}$  coordinate of the  $m^{\text{th}}$  and  $n^{\text{th}}$  frame, respectively.  $RMSD_{m,n}$  is the specific root-mean-square deviation between the  $m^{\text{th}}$  and  $n^{\text{th}}$  frame.

**Equation S2.** Calculation of the average pairwise RMSD.

$$RMSD = \frac{\sum_2^n \sum_1^{m < n} RMSD_{m,n}}{\sum_{i=1}^{n-1} i}$$

Where  $n$  is the total number of frames and RMSD is the mean pairwise root-mean-square deviation between all pairs of frames.

**Equation S3.** Calculation of the standard deviation (std).

$$std = \sqrt{\frac{\sum_2^n \sum_1^{m < n} (RMSD_{m,n} - RMSD)^2}{n - 1}}$$

Where  $n$  is the number of frames, RMSD is the mean pairwise root mean square deviation between all pairs of frames and  $RMSD_{m,n}$  is the specific root-mean-square deviation between the  $m^{\text{th}}$  and  $n^{\text{th}}$  frame.
